# Supplementary material for: PEGylated silicon nanoparticles: synthesis and characterization
Source: Royal Society of Chemistry journal article supplement (doi:10.1039/b813025f), 2008-01-01
Supplement: b813025f.pdf [file b813025f.pdf]

**Supplementary Information**

**PEGylated Silicon Nanoparticles: Synthesis and Characterization**

**P.K. Sudeep, Zachariah Page, and Todd Emrick\***

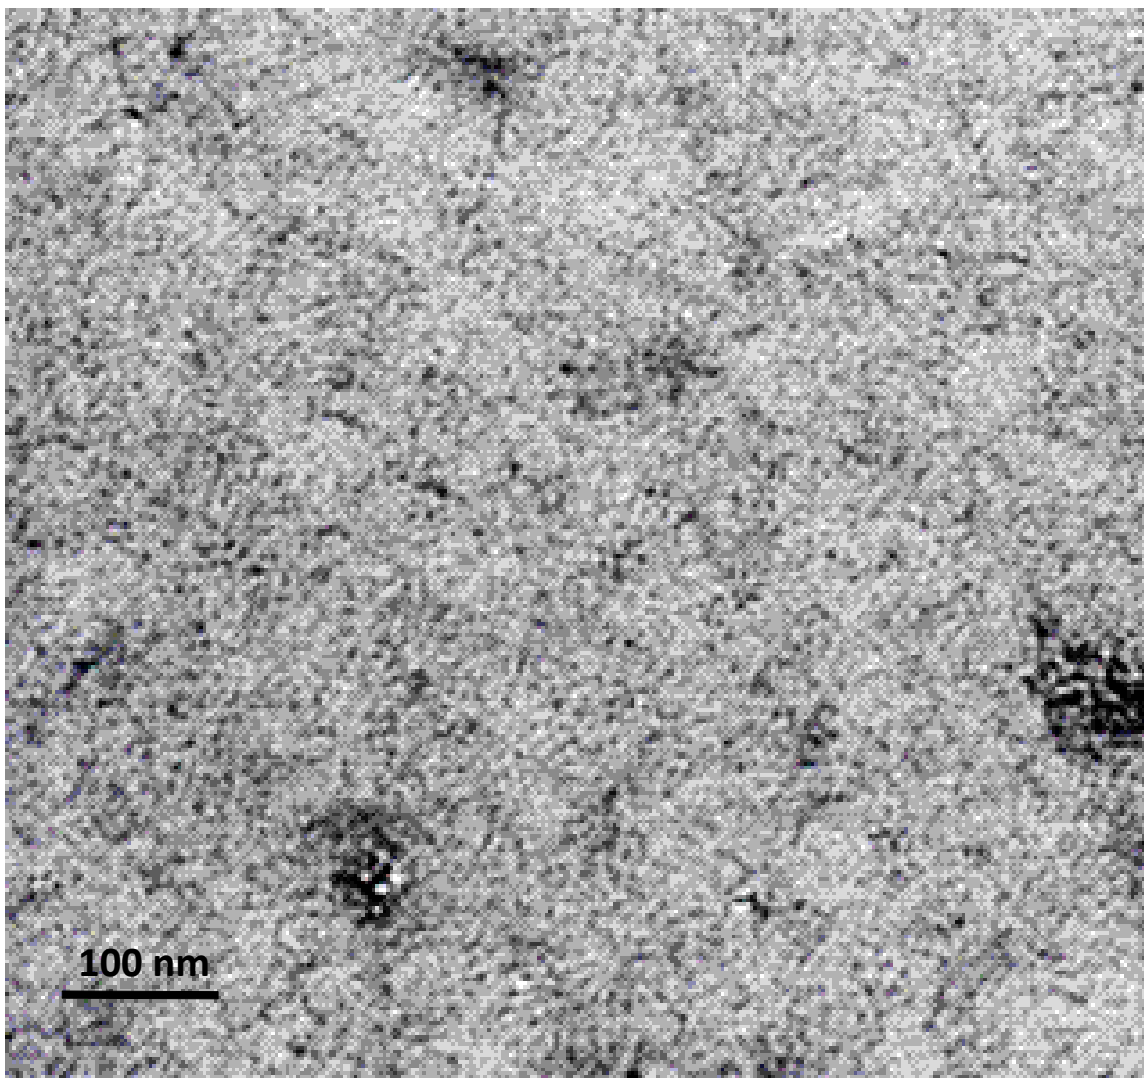

**Figure S1. TEM image of PEGylated silicon nanoparticles on a carbon coated copper grid.**
